# Supplementary material for: Unveiling the synergistic effect of an nZVI–SiO2–TiO2 nanocomposite for the remediation of dye contaminated wastewater
Source: Royal Society of Chemistry journal article supplement (doi:10.1039/d4ma00853g), 2024-01-01
Supplement: d4ma00853g1.zip [file d4ma00853g1.zip]

## Sheet: Thermodynamic Properties 
		Kd	Ln(kd)
		11.3609	2.43018											col(D)+273	1/col(E)	col(G)/1000/319.85	col(i)/1000/319.85	col(H)-col(j)	col(K)/col(j)
		16.2712	2.78939										T	T	1/T	Ci	Ci	Ce		qe	Kd	ln(Kd)
		26.027	3.25914										Degrees	Kelvin	k-1	mol/L	mg/L	mol/L	qe/Ce
		61.5	4.11904										30	303	0.00330033	10	3.12647e-05	0.809	2.52931e-06	2.87353e-05	11.3609	2.53018
													40	313	0.00319489	10	3.12647e-05	0.579	1.81022e-06	2.94544e-05	16.2712	2.78939
		Intercept	20.6275	±	2.93156								50	323	0.00309598	10	3.12647e-05	0.37	1.15679e-06	3.01079e-05	26.027	3.25914
		slope	-5551.16	±	930.506								60	333	0.003003	10	3.12647e-05	0.16	5.00234e-07	3.07644e-05	61.5	4.11904
						Intercept = Ds/R		R = 8.314 J/mol
					20.6275	0.171497		0.008314	kJ/mol
					DS	0.171497
									0.194727
				Slope = DH/R
				DH =	46.1524				-53.3375		46.15
					46.1524	DG
		303		DG = DH-TDs		-5.81136
		313				-7.52633
		323				-9.24131
		333				-10.9563
